# Supplementary material
Source: PubMed Central journal article supplement (PMC7348668)
Supplement: NIHMS1592488-supplement-figure_S1.pdf [file NIHMS1592488-supplement-figure_S1.pdf]

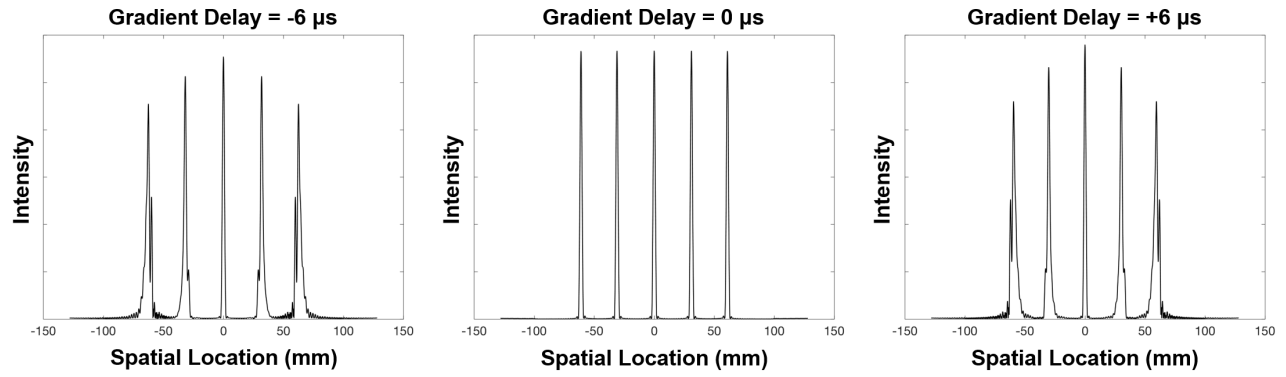

**Supporting Information Figure S1.** Point-spread-functions as a function of distance from FOV center at gradient delays of -6, 0, and +6  $\mu\text{s}$ . The locations of these point objects were matched to those of the five small samples shown in **Figure 3**.
